# Supplementary material
Source: Springer Nature journal article supplement (https://www.springermedizin.de/resource/supplementary/12885_2014_4938_MOESM1_ESM.pdf/9467780)
Supplement: MOESM1 [file 9467780]

## **Introduction to Additional file 1 – further information relating to Figures S1-S3**

**Figure S1:** Production of a CDCP1-expressing Colo320 cell line. Clones of G418-resistant Colo320 cells were produced as described in Methods. A. Clonal cell populations were screened for cell-surface CDCP1 expression by flow cytometry using the mouse monoclonal antibody CUB1. B. A selection of clones was further analysed by Western blotting using the anti-FLAG M2 antibody in Western blotting of whole cell extracts. Clone 12 was used for all further experiments since it displayed the highest level of cell-surface CDCP1 (assessed by flow cytometry) and total cellular CDCP1 (assessed by Western blotting).

**Figure S2:** Reduction of CDCP1 by RNA interference in SW480 cells. SW480 cells were plated at  $2.2 \times 10^5$  cells per well in six well plates, cultured for approx. 15 h and transfected with 20pmoles of CDCP1 siRNA using Lipofectamine 2000. Three duplex siRNAs (at 8nM final concentration) were screened for reduction of CDCP1 (oligos 1–3). A) Cell-surface CDCP1 expression was assayed 48 hours post-transfection by flow cytometry using the CUB1 monoclonal antibody. B) To confirm the flow cytometry results shown in (A), total CDCP1 protein expression in SW480 cells at 48 hours post-transfection with 8nM siRNA (oligo 2) was analysed by Western blotting using the goat polyclonal anti-CDCP1 antibody. Oligo 2 (used in the remainder of this study) proved to be the most efficacious in reducing cell-surface and total cellular CDCP1.

**Figure S3:** Reduction of SW480 colon cancer motility as a function of time after transfection of CDCP1 siRNA. The motility of SW480 cells through an 8  $\mu$ m pore membrane towards FBS following reduction of CDCP1 by RNA interference was measured using the Roche xCELLigence system. Data points at 1, 40, 60 and 72 h are shown. - = no addition; 10% serum = 10% FBS was present in the lower chamber; Lipofectamine = Lipofectamine 2000 only; Control siRNA = Lipofectamine 2000 and control siRNA; CDCP1 siRNA = Lipofectamine 2000 and CDCP1 siRNA.

# Supplementary Figure 1

A

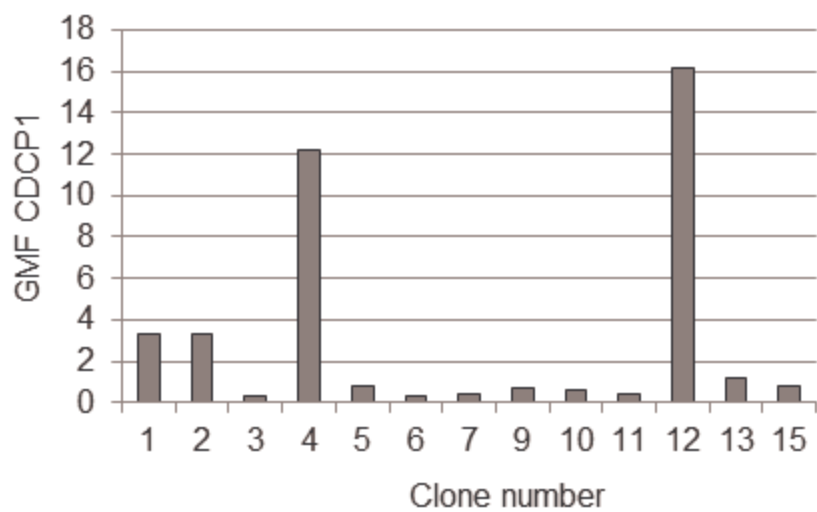

B

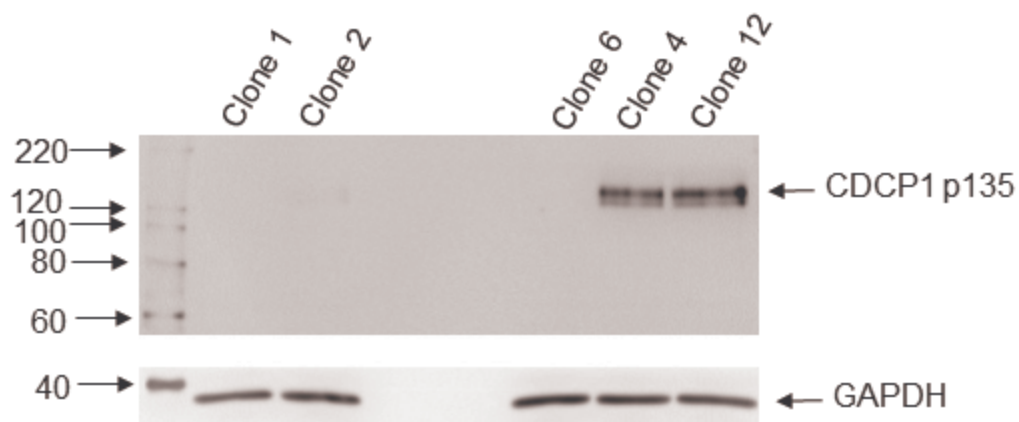

# Supplementary Figure 2

A

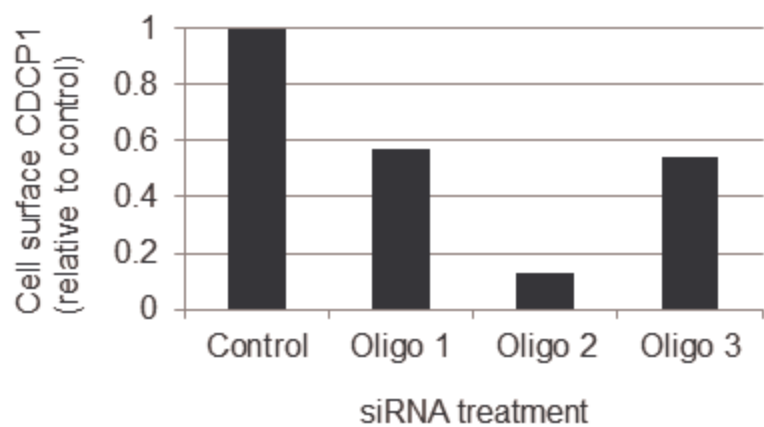

B

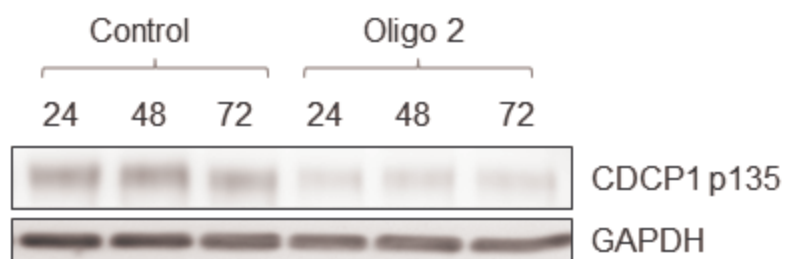

Supplementary Figure 3

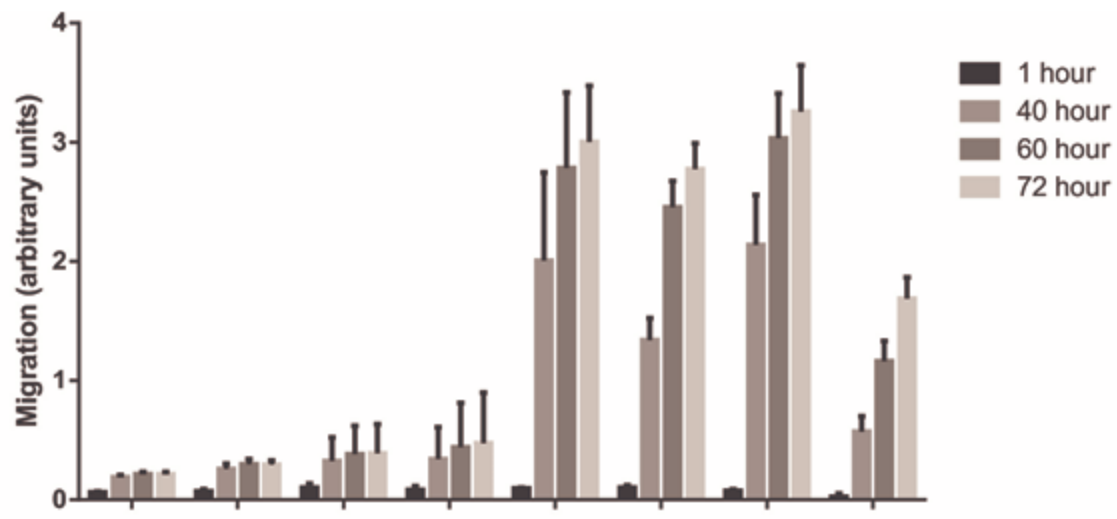

| Chemo-attractant: | 10% Serum | Lipofectamine | Control siRNA | CDCP1 siRNA | 1 hour | 40 hour | 60 hour | 72 hour |
|-------------------|-----------|---------------|---------------|-------------|--------|---------|---------|---------|
|                   | -         | -             | -             | -           | ~0.1   | ~0.2    | ~0.2    | ~0.2    |
|                   | -         | +             | -             | -           | ~0.1   | ~0.3    | ~0.3    | ~0.3    |
|                   | -         | +             | +             | -           | ~0.1   | ~0.3    | ~0.4    | ~0.4    |
|                   | -         | +             | -             | +           | ~0.1   | ~0.4    | ~0.5    | ~0.5    |
|                   | +         | -             | -             | -           | ~0.1   | ~2.0    | ~2.8    | ~3.0    |
|                   | +         | +             | -             | -           | ~0.1   | ~1.4    | ~2.5    | ~2.8    |
|                   | +         | -             | +             | -           | ~0.1   | ~2.2    | ~3.0    | ~3.3    |
|                   | +         | +             | -             | +           | ~0.1   | ~0.6    | ~1.2    | ~1.7    |
